# Supplementary material for: Alternative polyadenylation regulates the translation of metabolic and inflammation-related proteins in adipose tissue of gestational diabetes mellitus
Source: PubMed Central journal article supplement — Comput Struct Biotechnol J. 2024 Mar 15;23:1298–310. doi: 10.1016/j.csbj.2024.03.013 (PMC10978812; doi:10.1016/j.csbj.2024.03.013), 2024-03-15
Supplement: mmc1.pdf [file mmc1.pdf]

a

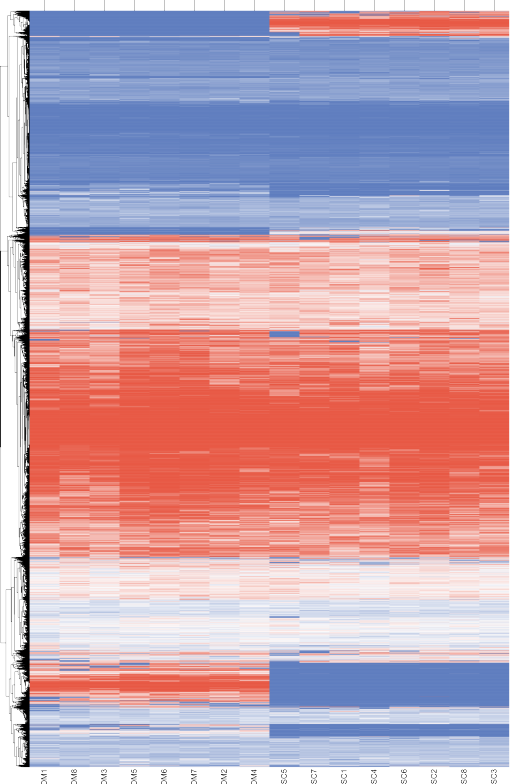

b

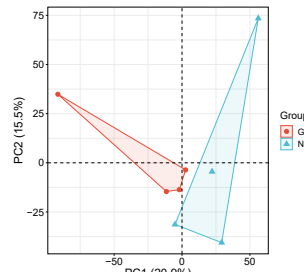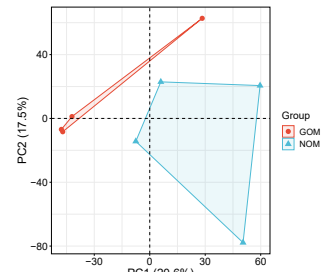

c

• Distal PAS in GSC (567) • Proximal PAS in GSC (405) • Distal PAS in GOM (885) • Proximal PAS in GOM (233)

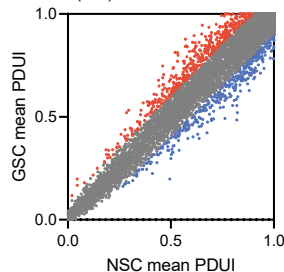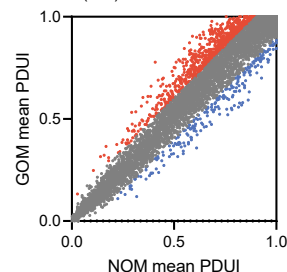

• Distal PAS in NOM (486) • Proximal PAS in NOM (476)

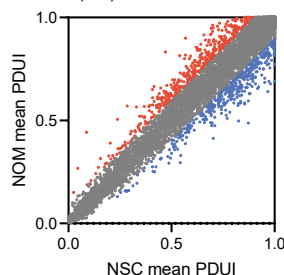

• Distal PAS in GOM (700) • Proximal PAS in GOM (214)

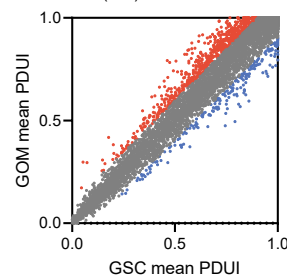

d

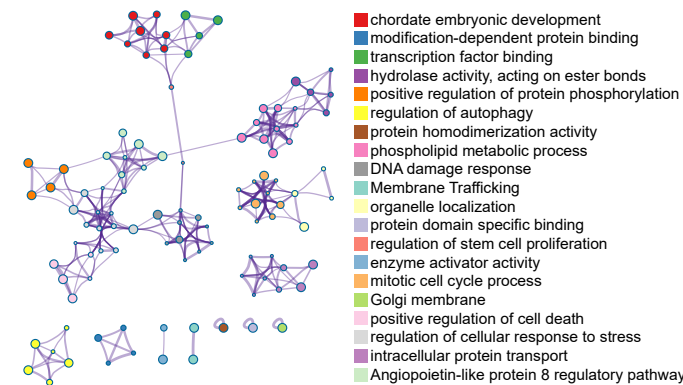

GSC vs NSC

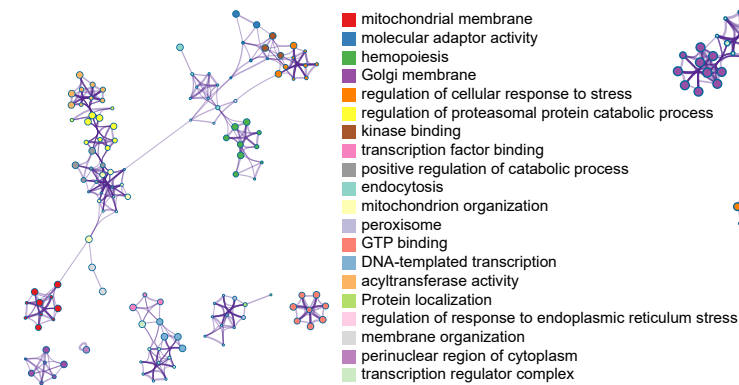

NSC vs NOM

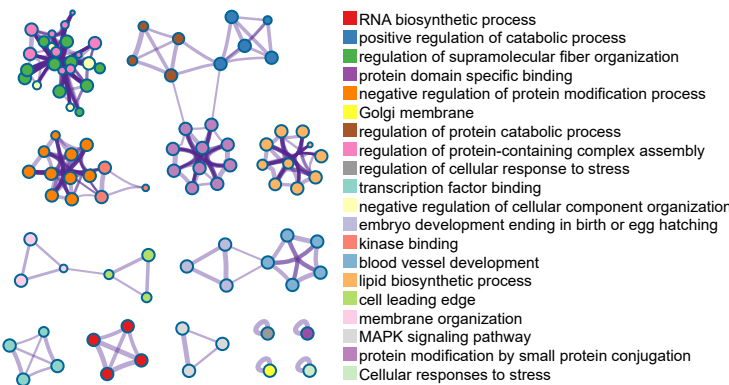

GOM vs NOM

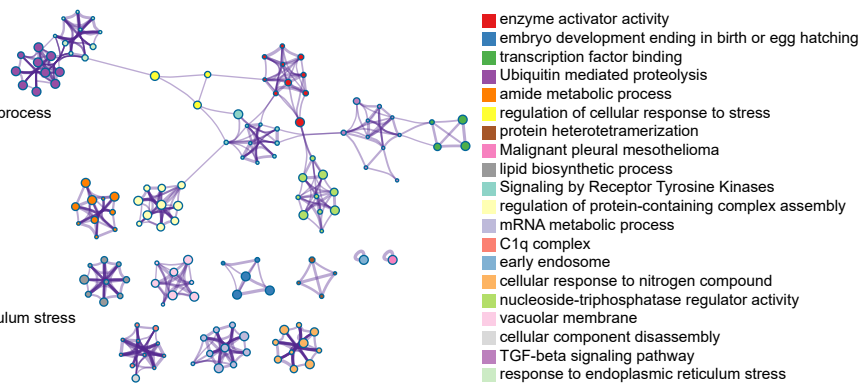

GSC vs GOM
