# Supplementary figures and images for: Alternative polyadenylation regulates the translation of metabolic and inflammation-related proteins in adipose tissue of gestational diabetes mellitus
Source: PubMed Central journal article supplement — Comput Struct Biotechnol J. 2024 Mar 15;23:1298–310. doi: 10.1016/j.csbj.2024.03.013 (PMC10978812; doi:10.1016/j.csbj.2024.03.013), 2024-03-15

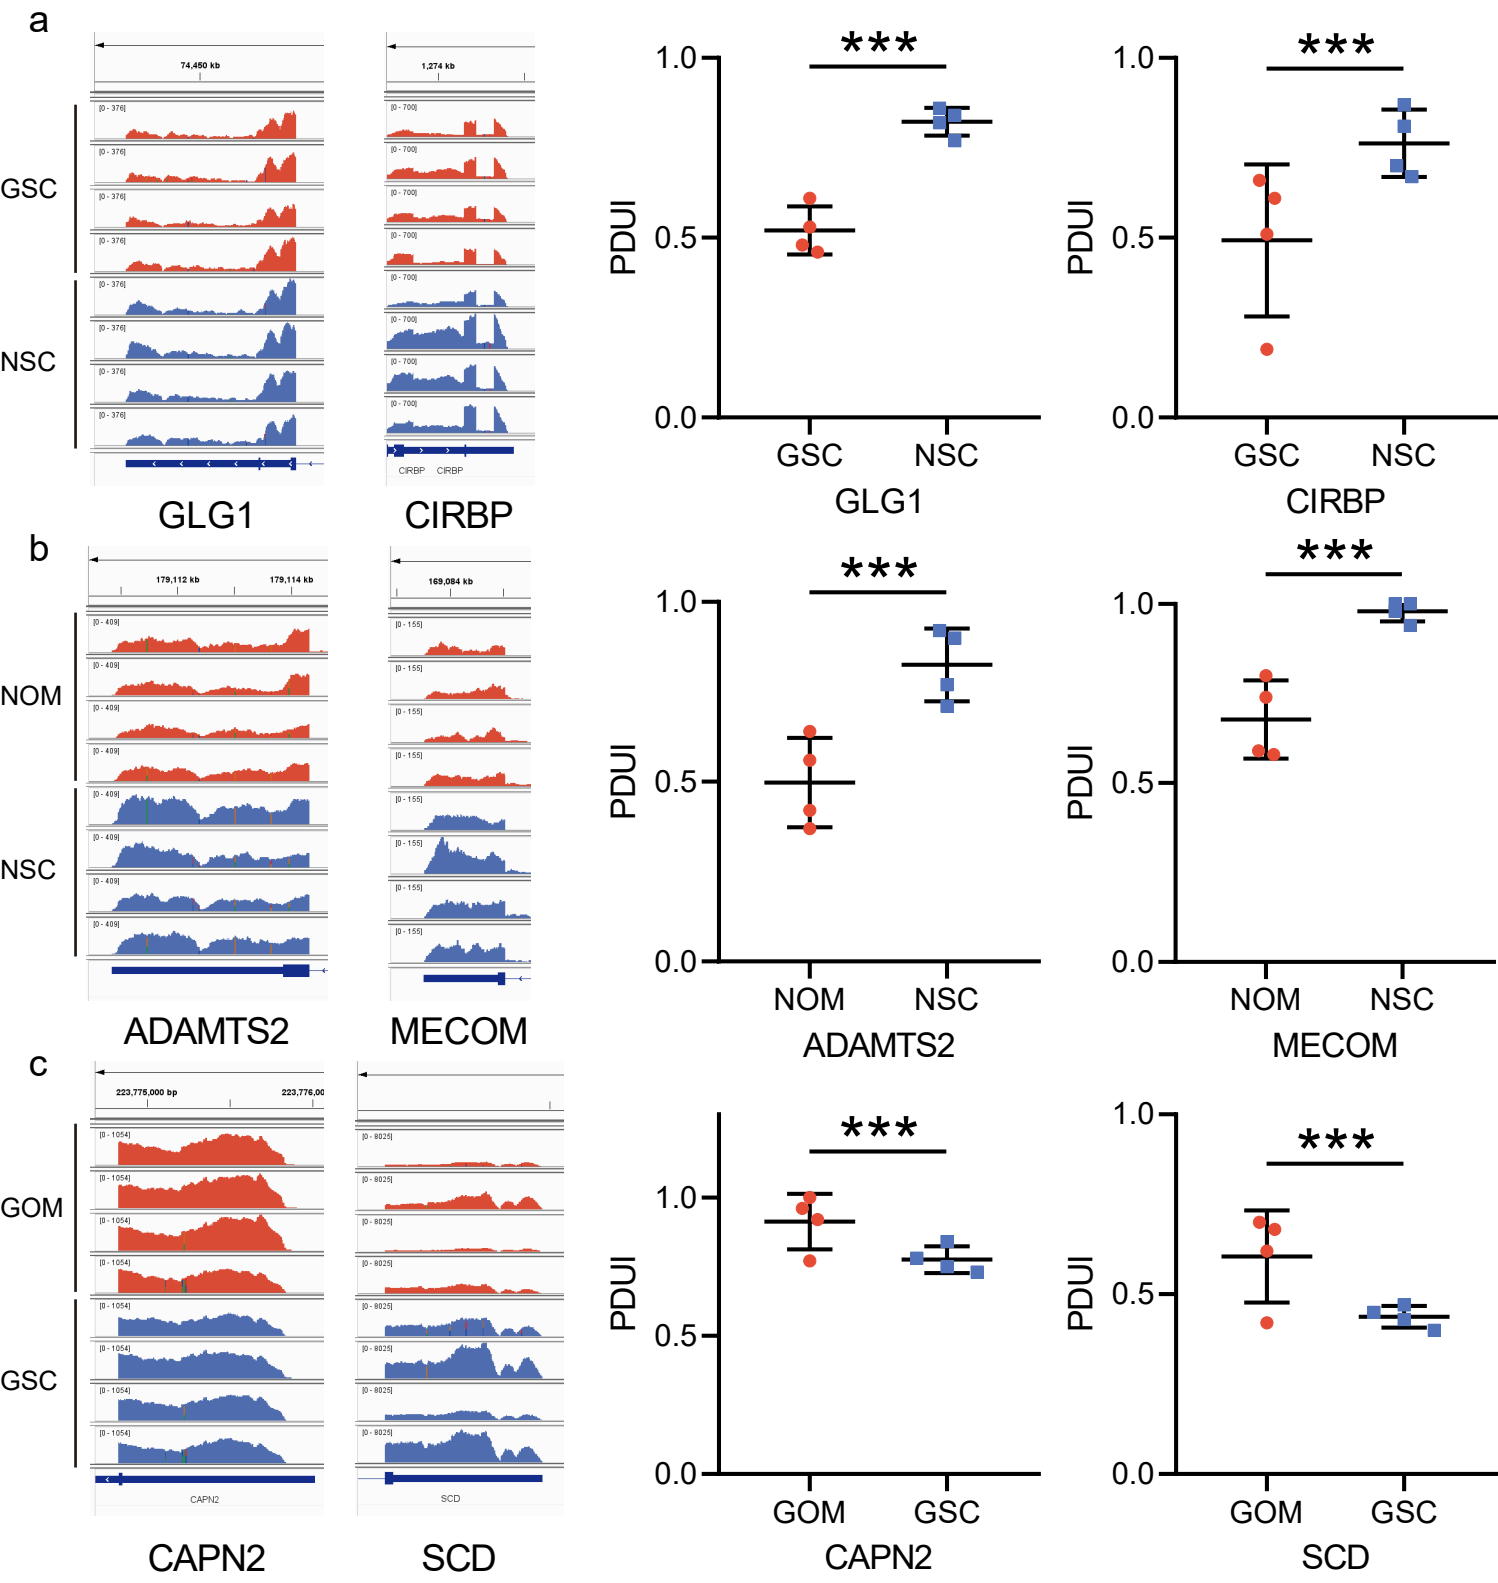

Supplement: mmc2.pdf [file mmc2.pdf]

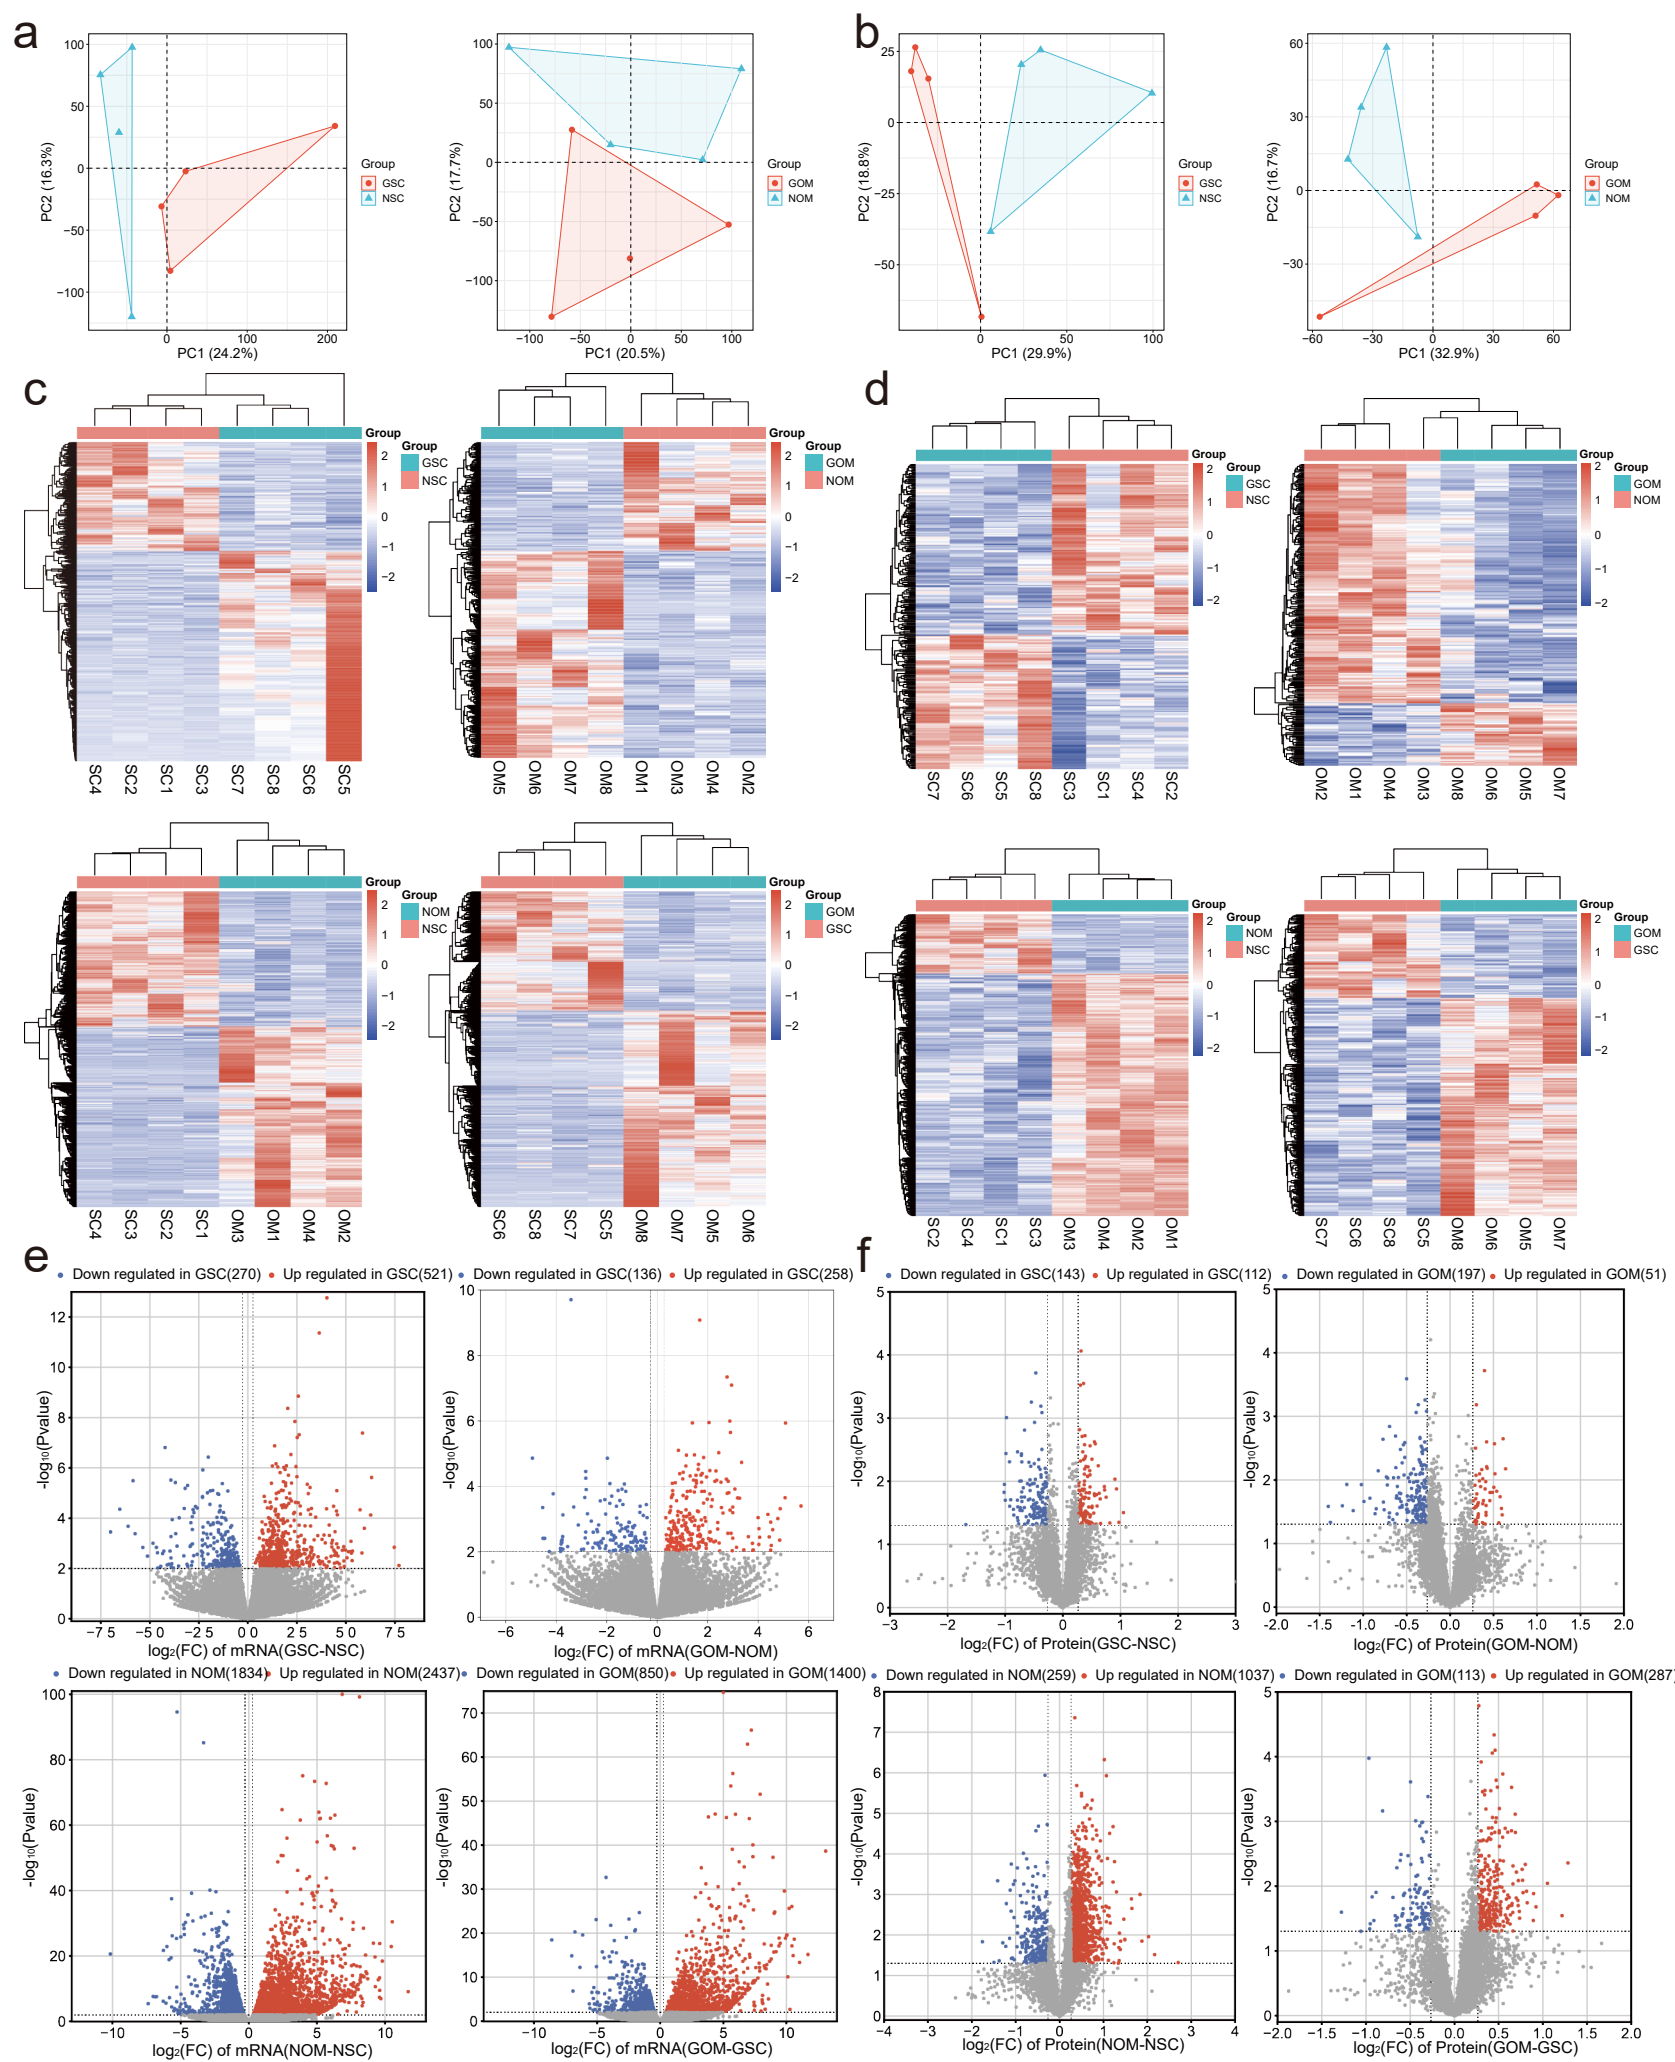

Supplement: mmc3.pdf [file mmc3.pdf]

**a**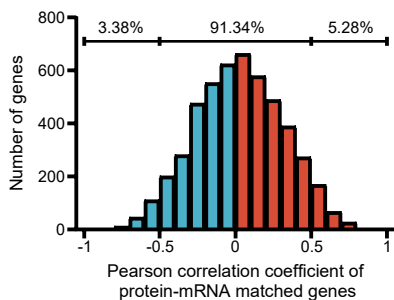**b**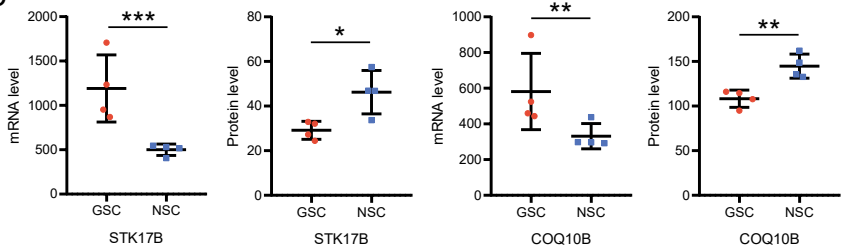**c**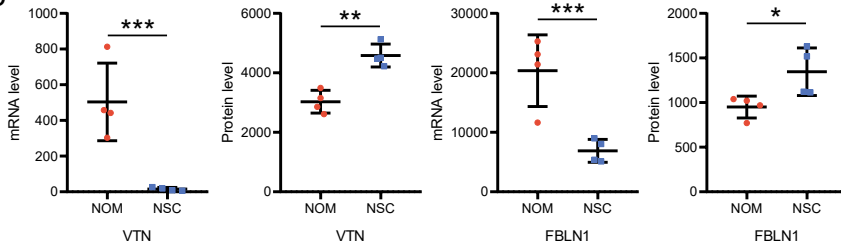**d**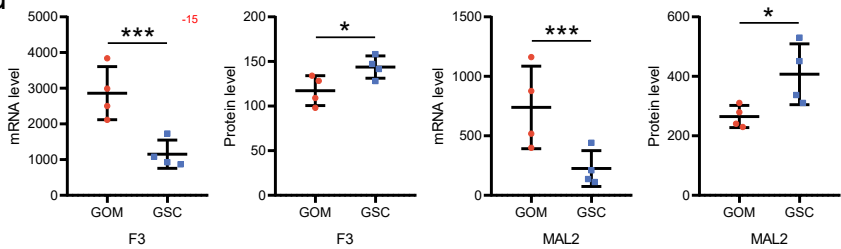

Supplement: mmc4.pdf [file mmc4.pdf]

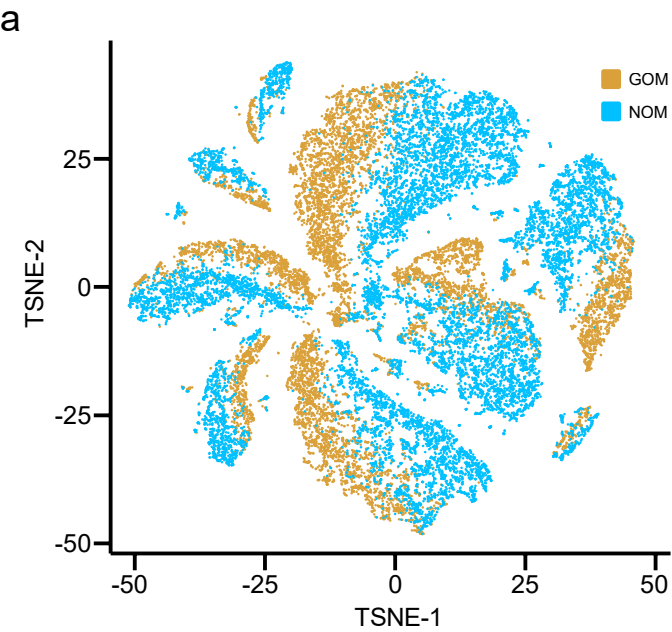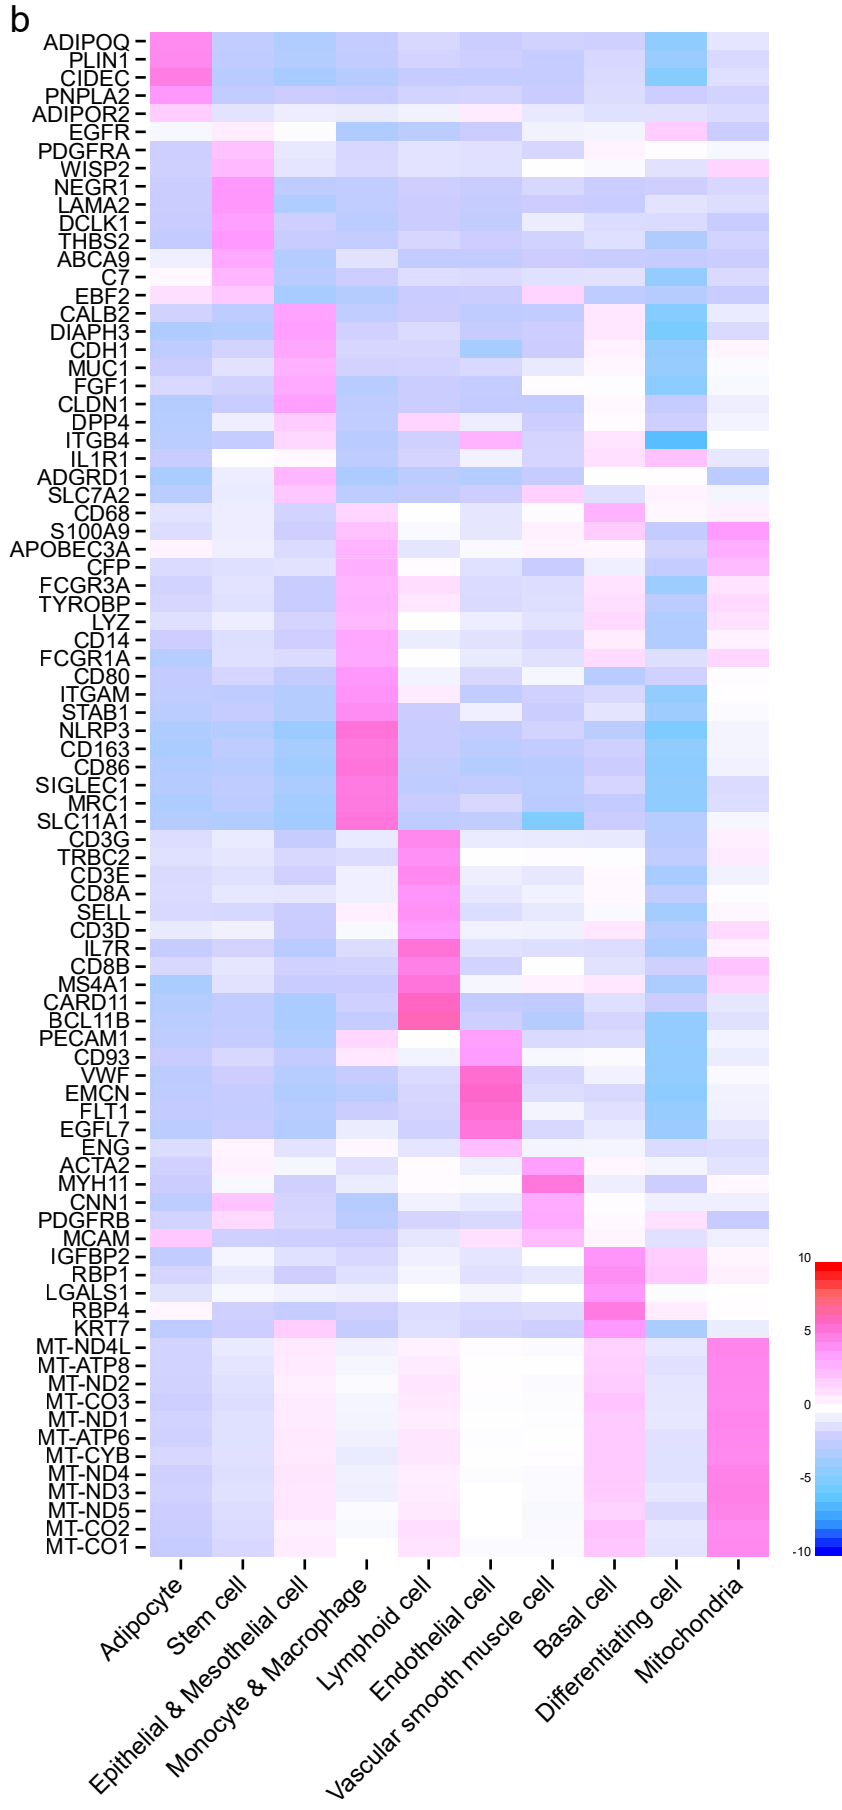

Supplement: mmc5.pdf [file mmc5.pdf]
